# Supplementary material
Source: publisher figshare collection journal article supplement (https://acs.figshare.com/ndownloader/files/12462332)
Supplement: Supplementary file 1 [file 12462332]

# Thiol Reactivity Analyses to Predict Mammalian Cell Cytotoxicity of Water Samples

Shengkun Dong,<sup>†,‡</sup> Martin A. Page,<sup>§</sup> Elizabeth D. Wagner,<sup>□,‡</sup> Michael J. Plewa \*<sup>□,‡</sup>

<sup>†</sup> Department of Civil and Environmental Engineering,

<sup>□</sup> Department of Crop Sciences,

<sup>‡</sup> Safe Global Water Institute,

University of Illinois at Urbana-Champaign,

1101 West Peabody Dr., Urbana, Illinois 61801, United States of America

<sup>§</sup> US Army Engineer Research and Development Center,

2902 Newmark Dr., Champaign, Illinois 61822, United States of America

\* Author to whom correspondence should be addressed:

Michael J. Plewa; e-mail: [mplewa@illinois.edu](mailto:mplewa@illinois.edu)

17 **SUPPORTING INFORMATION**

18

19 Detailed Procedure of NAC Thiol Reactivity Assay. S2

20

21 Table S1, NAC assay form S5

22

23 Figure S1. Image of a NAC Thiol reactivity plate illustrating the loss of reacting S6  
24 thiol groups as function of the concentration of a test sample.

25

26 Table S2. Calculated  $LC_{50}$  values from  $EC_{50}$  values. S7

27

**Detailed Procedure of NAC Thiol Reactivity Assay.** The preparation of the reagents for the NAC Reactivity Assay are listed below.

1. **Tris buffer, 200 mM, pH 8.** In a beaker, add 230 mL distilled water, 4.44 g Tris HCL and 2.65 g Tris Base, mix, adjust to 250 mL using a volumetric flask. Pour into a reagent bottle, sterilize by autoclaving.
2. **Potassium phosphate buffer, 100 mM with 0.1 mM EDTA, pH 8.** Separately prepare 100 mL each of 1 M dibasic potassium phosphate and 1 M monobasic potassium phosphate each in distilled water using volumetric flasks. Prepare a 200 mM EDTA solution in distilled water. For the 100 mM potassium phosphate buffer for the assay mix 9.4 mL of the 1 M dibasic potassium phosphate solution plus 0.6 mL of the monobasic potassium phosphate solution with 50  $\mu$ L of 200 mM EDTA. Add distilled water to 100 mL using a volumetric flask, autoclave.
3. **Ellman's reagent.** Prepare a 1 mM DTNB solution (5, 5'-dithiobis (2-nitrobenzoic acid), (DTNB) in a 100 mM potassium phosphate buffer with 0.1 mM EDTA, pH 8 for a final concentration of 1 mM DTNB. Filter-sterilize the solution store for no more than 4 months at 4°C in the dark.
4. ***N*-Acetyl-*L*-cysteine (NAC) reagent.** Prepare a 100 mM stock solution of NAC in 200 mM Tris buffer, pH 8 and stored at 4°C. The NAC solution should be stored no longer than 1 month.
5. **Maleimide reagent.** Prepare a 100 mM stock solution of 2,5-Pyrroledione (maleimide) in absolute ethanol. Store at 4°C. Maleimide is used as a positive control for the assay.
6. **NAC Thiol Assay form.** A general assay form based on a 96-well microplate was developed for conducting the assay and is presented below.

51 In general a test sample is reacted with NAC for 20 min in a volume of 50  $\mu$ L followed with the  
52 addition of 50  $\mu$ L DTNB for resolution at  $A_{412}$ . Each microplate contained a concurrent negative  
53 control (Figure S1, column 1), positive control (Figure S1, wells 12E-12H)), sample concentra-  
54 tions, and their corresponding blanks. For the negative control, each well contained 40  $\mu$ L Tris  
55 buffer pH 8, 10  $\mu$ L of 2 mM NAC, and 50  $\mu$ L of 1 mM DTNB. For the positive control, each  
56 well contained 38  $\mu$ L Tris buffer pH 8, 10  $\mu$ L of 4 mM NAC, 2  $\mu$ L of 10 mM maleimide and 50  
57  $\mu$ L of 1 mM DTNB. For the treatment groups, each well typically contained 10  $\mu$ L of 4 mM  
58 NAC, 50  $\mu$ L of 1 mM DTNB, a serial dilution of the concentrated water XAD extract and Tris  
59 buffer at pH 8. The total volume of the sample and Tris buffer was 40  $\mu$ L. Sample blanks are im-  
60 portant because they correct for the background  $A_{412}$ . Each corresponding blank well typically  
61 contained 50  $\mu$ L of 1 mM DTNB, an identical volume of sample to which this blank corre-  
62 sponds, and Tris buffer at pH 8 for a total volume of 100  $\mu$ L, without NAC was added first fol-  
63 lowed by the test sample (or maleimide positive control) and the NAC was added last. After 20  
64 min incubation on a rocker platform in the dark, 50  $\mu$ L of 1 mM DTNB was added to quantify  
65 the available thiols. Directly after the addition of DTNB, the plate was analyzed at 412 nm on a  
66 microplate reader after linear shaking of 10 sec (Figure S1).

**Table S1. Form.**

**NAC THIOL REACTIVITY ASSAY**

Date: Experiment №

Test Agent:

Stock Sol:

DIL A\*

DIL B\*

DIL C\*

| Microplate Wells | Tris pH8 $\mu$ L | 4 mM NAC $\mu$ L | Agent $\mu$ L | DIL | 1 mM Ellman's Sol. $\mu$ L ** | Agent Concentration or Concentration Factor |
|------------------|------------------|------------------|---------------|-----|-------------------------------|---------------------------------------------|
| A1-D1            | 40               | 10               | –             | –   | 50                            | 400 $\mu$ M NAC Control                     |
| A2-D2            |                  | 10               |               |     | 50                            |                                             |
| A3-D3            |                  | 10               |               |     | 50                            |                                             |
| A4-D4            |                  | 10               |               |     | 50                            |                                             |
| A5-D5            |                  | 10               |               |     | 50                            |                                             |
| A6-D6            |                  | 10               |               |     | 50                            |                                             |
| A7-D7            |                  | 10               |               |     | 50                            |                                             |
| A8-D8            |                  | 10               |               |     | 50                            |                                             |
| A9-D9            |                  | 10               |               |     | 50                            |                                             |
| A10-D10          |                  | 10               |               |     | 50                            |                                             |
| A11-D11          |                  | 10               |               |     | 50                            |                                             |
| A12-D12          |                  | 10               |               |     | 50                            |                                             |
| G1-H1            | 50               | 0                | –             | –   | 50                            | Corresponding Blank                         |
| G2-H2            |                  | 0                |               |     | 50                            | Corresponding Blank                         |
| G3-H3            |                  | 0                |               |     | 50                            | Corresponding Blank                         |
| G4-H4            |                  | 0                |               |     | 50                            | Corresponding Blank                         |
| G5-H5            |                  | 0                |               |     | 50                            | Corresponding Blank                         |
| G6-H6            |                  | 0                |               |     | 50                            | Corresponding Blank                         |
| G7-H7            |                  | 0                |               |     | 50                            | Corresponding Blank                         |
| G8-H8            |                  | 0                |               |     | 50                            | Corresponding Blank                         |
| G9-H9            |                  | 0                |               |     | 50                            | Corresponding Blank                         |
| G10-H10          |                  | 0                |               |     | 50                            | Corresponding Blank                         |
| G11-H11          |                  | 0                |               |     | 50                            | Corresponding Blank                         |
| G12-H12          |                  | 0                |               |     | 50                            | Corresponding Blank                         |

\* All sample agents are diluted in Tris buffer (pH 8). Total volume of reaction well = 50  $\mu$ L. \*\* After 20 min reaction time while shaking, room temperature add the 50  $\mu$ L Ellman's reagent. Total volume of wells = 100  $\mu$ L immediately read plate in Spectra-Max at 412 nm. \*\*\* Positive control = 2  $\mu$ L of a 10 mM maleimide in EtOH. Put positive control in wells E1, E2. (10  $\mu$ L NAC), 2  $\mu$ L Maleimide stock solution plus 38  $\mu$ L Tris buffer. NAC 4 mM: 100 mM NAC stock - 4/100  $\times$  1000 = 40  $\mu$ L NAC stock + 960  $\mu$ L Tris buffer. M. Plewa, University of Illinois at Urbana-Champaign, mplewa@illinois.edu

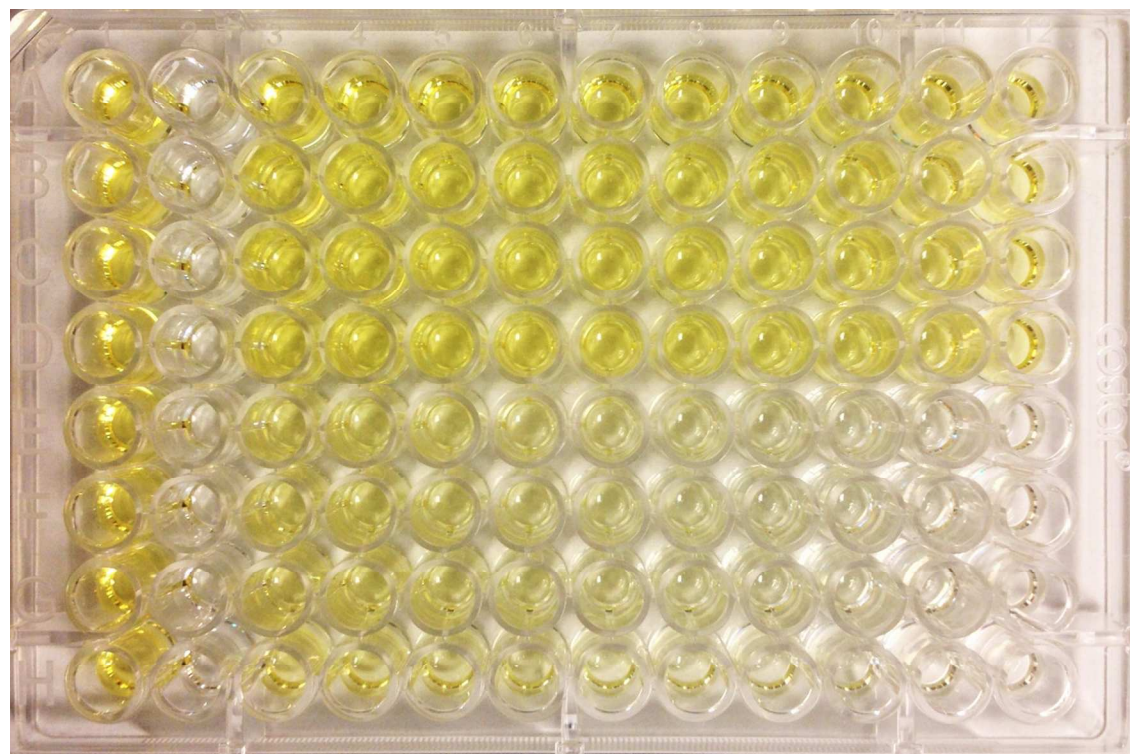

**Figure S1.** Image of a NAC Thiol reactivity plate illustrating the loss of reacting thiol groups as function of the concentration of a test sample.

97

98

99 **Table S2.** Calculated LC<sub>50</sub> values from EC<sub>50</sub> values. Double click the following table to activate

100 its embedded equations:

101

|                                                                              |                    |              |  |  |  |  |
|------------------------------------------------------------------------------|--------------------|--------------|--|--|--|--|
| Note: Enter the obtained EC50 value from NAC thiol reactivity assay into the |                    |              |  |  |  |  |
|                                                                              |                    |              |  |  |  |  |
| <b>Type</b>                                                                  | <b>Parameter</b>   | <b>Value</b> |  |  |  |  |
| Enter                                                                        | EC50               |              |  |  |  |  |
| Prediction                                                                   | Predicted $\alpha$ | 0.676        |  |  |  |  |
| Prediction                                                                   | Predicted $\ln$    | -4.95297     |  |  |  |  |
| Prediction                                                                   | Predicted $\ln$    | 6.304974     |  |  |  |  |
|                                                                              |                    |              |  |  |  |  |
|                                                                              |                    |              |  |  |  |  |
|                                                                              |                    |              |  |  |  |  |

102

103
